# Supplementary material
Source: HighWire-hosted journal article supplement (http://www.cmaj.ca/highwire/filestream/58558/field_highwire_adjunct_files/0/image-singh-1-at.pdf)

Appendix 1: (A) Posteroanterior chest radiograph in a 42-year-old man with hemoptysis showing a large, ill-defined opacity in the right lower zone. (B) Computed tomographic image (mediastinal window) of the thorax showing a heterogeneous cystic mass in the right lower lobe with air foci within it. (C) Histopathologic specimen showing the classic laminated appearance of the echinococcal membrane (hematoxylin–eosin stain, original magnification  $\times 2$ ). (D) Gross photograph showing the echinococcal cyst resected from the right lower lobe.

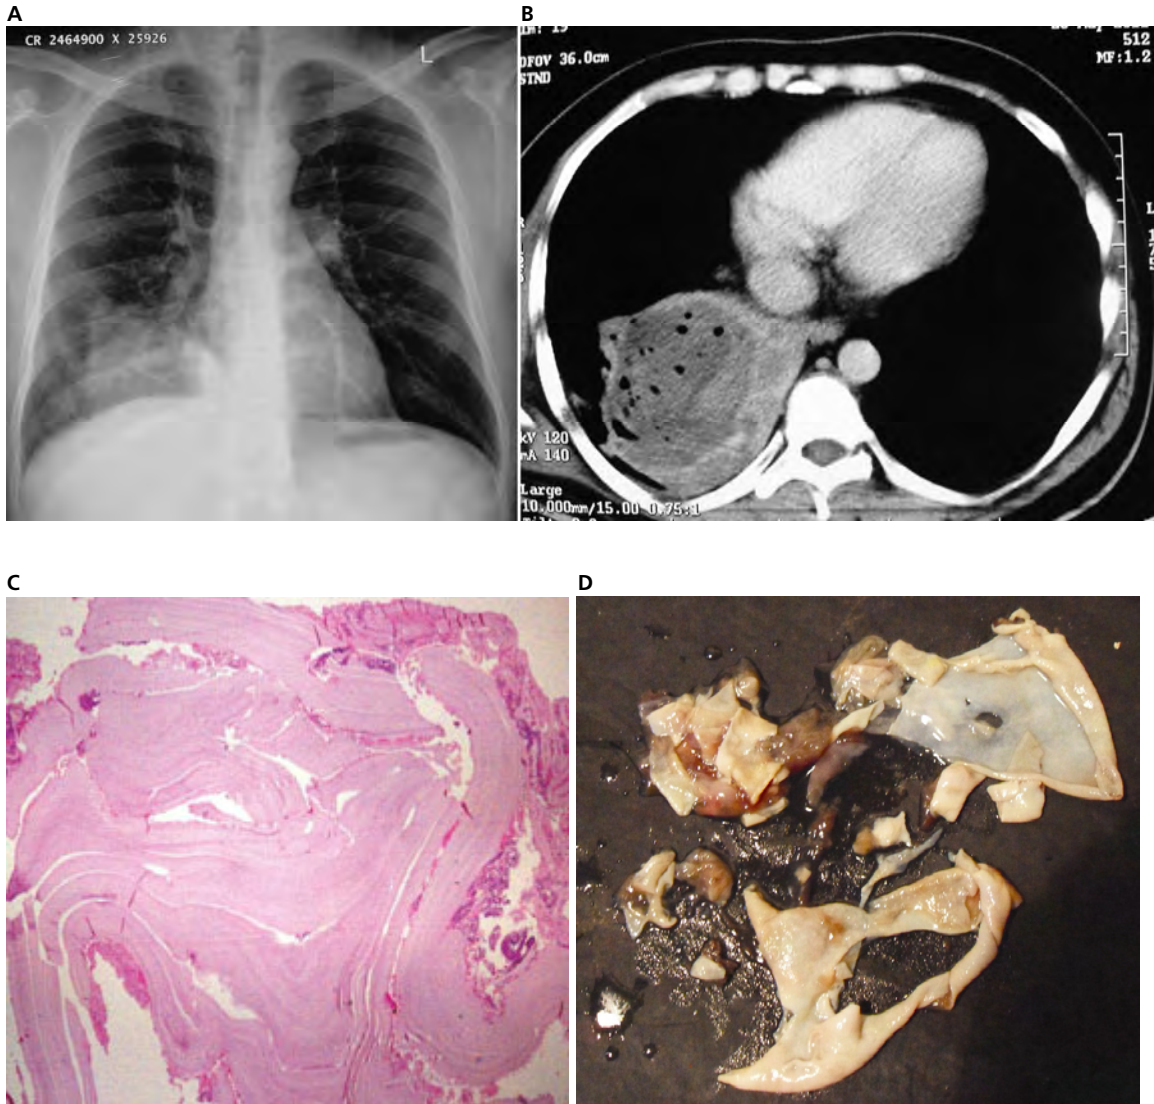

Supplement: image-singh-1-at.pdf [file image-singh-1-at.pdf]
